1 **DRAFT MANUSCRIPT**

2 Validation of novel *Mycobacterium tuberculosis* isoniazid resistance mutations not detectable by common  
3 molecular tests

4  
5 Justin L. Kandler<sup>a\*</sup>, Alexandra D. Mercante<sup>a\*\*</sup>, Tracy L. Dalton<sup>a</sup>, Matthew N. Ezewudo<sup>a,b</sup>, Lauren S. Cowan<sup>a</sup>,  
6 Scott P. Burns<sup>a</sup>, Beverly Metchock<sup>a</sup>, Global PETTS Investigators<sup>c</sup>, Peter Cegielski<sup>d</sup>, James E. Posey<sup>a#</sup>

7  
8 Running title: Novel INH resistance mutations in TB

9  
10 <sup>a</sup>Division of Tuberculosis Elimination, National Center for HIV/AIDS, Viral Hepatitis, STD, and TB  
11 Prevention, Centers for Disease Control and Prevention, Atlanta, Georgia, United States

12 <sup>b</sup>Critical Path Institute, Tucson, Arizona, United States

13 <sup>c</sup>The complete listing of contributing Global PETTS Investigators can be found in the Acknowledgements

14 <sup>d</sup>Division of Global HIV & TB, Center for Global Health, Centers for Disease Control and Prevention, Atlanta,  
15 Georgia, United States

16 \*Present address: Fulgent Genetics, Atlanta, Georgia, United States

17 \*\*Present address: Enteric Diseases Laboratory Branch, Division of Foodborne, Waterborne, and  
18 Environmental Diseases, National Center for Emerging Zoonotic and Infectious Diseases, Centers for Disease  
19 Control and Prevention, Atlanta, Georgia, United States

20 #Please address any correspondence to James E. Posey, [hzp9@cdc.gov](mailto:hzp9@cdc.gov)

## 21 **Abstract**

22 Resistance to the first-line anti-tuberculosis (TB) drug, isoniazid (INH), is widespread, and the  
23 mechanism of resistance is unknown in approximately 15% of INH-resistant (INH-R) strains. To improve  
24 molecular detection of INH-R TB, we used whole genome sequencing (WGS) to analyze 52 phenotypically  
25 INH-R *Mycobacterium tuberculosis* complex (MTBC) clinical isolates that lacked the common *katG* S315T or  
26 *inhA* promoter mutations. Approximately 94% (49/52) of strains had mutations at known INH-associated loci  
27 that were likely to confer INH resistance. All such mutations would be detectable by sequencing more DNA  
28 adjacent to existing target regions. Use of WGS minimized the chances of missing infrequent INH resistance  
29 mutations outside commonly targeted hotspots. We used recombineering to generate 12 observed clinical *katG*  
30 mutations in the pansusceptible H37Rv reference strain and determined their impact on INH resistance. Our  
31 functional genetic experiments have confirmed the role of seven suspected INH resistance mutations and  
32 discovered five novel INH resistance mutations. All recombineered *katG* mutations conferred resistance to INH  
33 at a minimum inhibitory concentration of  $\geq 0.25$   $\mu\text{g/mL}$  and should be added to the list of INH resistance  
34 determinants targeted by molecular diagnostic assays. We conclude that WGS is a superior method for detection  
35 of INH-R MTBC compared to current targeted molecular testing methods and could provide earlier diagnosis of  
36 drug-resistant TB.

43

## 44 **Introduction**

45 Tuberculosis (TB) is the leading cause of death from a single infectious agent (1), yet in 2014, only  
46 3.8% of global development assistance for health funding was for TB (2). The World Health Organization  
47 (WHO) estimates that in 2016 alone, 1.674 million people died from TB (1). While ~52.5 million lives were  
48 saved between 2000 and 2016 by improving diagnostics and treatments (1), 13 of the 22 highest-burden  
49 countries were failing to meet TB prevalence reduction benchmarks in 2014 (3), highlighting the need for  
50 enhanced strategies to combat this disease. In the absence of an effective vaccine against pulmonary  
51 tuberculosis, suitable antibiotic therapy remains the most important means to stop TB.

52 Isoniazid (INH) rapidly kills actively growing *Mycobacterium tuberculosis* (*Mtb*) by inhibiting mycolic  
53 acid synthesis and thus destroying bacterial cell wall integrity (4) and is a crucial component of drug regimens  
54 for both latent TB infection and active TB disease (5, 6). INH remains on the WHO's lists of essential  
55 medicines for both children and adults (7, 8) and can be used for TB therapy even in cases where pregnancy and  
56 HIV may be complicating factors (9). However, INH resistance is globally widespread and ranged from ~6%-  
57 45% (years 1994-2009), depending on the region (10). Importantly, INH resistance is strongly associated with  
58 subsequent treatment failure, relapse, and acquired multidrug resistance (11) and precedes the acquisition of  
59 resistance to most other antimycobacterial drugs. The *katG* S315T, *inhA* I194T, and *fabG1-inhA* c-15t  
60 mutations arise before all other drug resistance mutations so frequently that they have been deemed "harbinger  
61 mutations", and early detection may be helpful in preventing the evolution and spread of multidrug resistant and  
62 extensively drug resistant (MDR and XDR) strains (12). If susceptibility to INH determines the success or  
63 failure of TB chemotherapy and the acquisition of resistance to other drugs, future diagnostic tools must strive  
64 to optimize sensitivity and specificity in order to limit cases where INH resistance is misdiagnosed.

65 In *Mtb*, mechanisms of resistance to INH have been studied extensively (reviewed in (13)). Yet,  
66 according to a systematic review of publications summarizing genotypic data for 8,796 phenotypically INH-R

67 clinical isolates from 49 countries (14), approximately 15% of INH-R strains could not be explained by known  
68 resistance-conferring mutations. By far the most common mutations leading to resistance are the *katG* S315T  
69 mutation and the (*mabA*) *fabG1-inhA* c-15t promoter mutation, which confer resistance by preventing activation  
70 of the INH prodrug (15, 16) or overexpressing the target of active INH (17), respectively. When combined,  
71 these two mutations account for approximately 83% of INH resistance (14). Other rare mutations have been  
72 experimentally confirmed as resistance determinants in *Mtb* by functional genetics and include the T275P and  
73 W300G mutations in *katG* (16, 18); partial or complete deletion of the *katG* open reading frame (19, 20); the g-  
74 7a, a-10c, and g-12c mutations in the *furA-katG* intergenic region (21); deletion of a 134 bp fragment that  
75 includes the *furA-katG* promoter (22); an S94A mutation in *inhA* (17); and the L203L silent mutation in *fabG1*,  
76 which increases expression of the downstream *inhA* gene (23). Numerous other mutations have been associated  
77 with INH resistance in *Mtb* clinical isolates but have yet to be investigated by functional genetics to confirm  
78 their role (13). Changes to the promoter region of the *ahpC* gene, encoding an alkyl hydroperoxidase, are  
79 frequently found in INH-R clinical isolates of *Mtb* but their role (if any) in directly conferring INH resistance  
80 remains unclear (13, 24).

81 Molecular methods commonly used to detect INH-R TB include line probe assays [LPAs; (25)] and  
82 sequencing of known resistance-associated genes by the Sanger method (26) or pyrosequencing (27). The WHO  
83 updated its recommendations in 2016 (28) to approve the use of the Hain GenoType MTBDR*plus* version 2  
84 (Hain Lifescience, Nehren, Germany) and Nipro NTM+MDRTB Detection Kit 2 (Nipro, Tokyo, Japan) LPAs.  
85 Both tests detect the *katG* S315T and *fabG1-inhA* c-15t/t-8c mutations. Additionally, MTBDR*plus* version 2  
86 detects *fabG1-inhA* a-16g and t-8a mutations, while NTM+MDRTB Detection Kit 2 can detect the *katG* S315N  
87 mutation (29, 30). In contrast to LPAs, targeted sequencing allows for customizable mutation detection. For  
88 example, the US Centers for Disease Control and Prevention (CDC) offers the Molecular Detection of Drug  
89 Resistance (MDDR) service (31), which detects mutations associated with first- and second-line drug  
90 resistance. Mutations associated with INH resistance are detected by MDDR by using Sanger and

91 pyrosequencing to target the following: the *katG* S315 codon, the *fabG1-inhA* promoter, the *ahpC* promoter,  
92 and the *fabG1* L203 codon.

93 Despite these molecular tools, phenotypic drug susceptibility testing (DST) is still considered the “gold  
94 standard” for determining MTBC drug resistance. Phenotypic DST requires costly infrastructure for culture  
95 (e.g. BSL-3 laboratory space etc.) and specialized training and equipment for MTBC-specific susceptibility  
96 testing (e.g. Bactec MGIT system). These difficulties, along with slow growth of MTBC cultures and the  
97 laborious nature of phenotypic DST assays, have highlighted the utility of molecular tests for detection of  
98 MTBC drug resistance. Although rapid molecular tests greatly decrease the turnaround time for resistance  
99 prediction compared to phenotypic DST, phenotypic resistance can occur in the absence of known genetic  
100 markers (i.e. discordance). Therefore, rapid molecular testing generally complements and does not replace  
101 phenotypic DST.

102 Strains of INH-R MTBC lacking common INH resistance mutations most likely encode resistance  
103 elsewhere in the genome and might hold clues to uncover INH resistance mechanisms in up to 15% of MTBC  
104 strains (14) whose resistance would not be detected by conventional rapid molecular testing (LPA,  
105 Sanger/pyrosequencing). In this work, we used whole genome sequencing (WGS) and phenotypic DST to  
106 determine probable causes of INH resistance in clinical isolates of MTBC lacking the common *katG* S315T and  
107 *fabG1-inhA* t-8a, t-8c, c-15t, a-16g promoter mutations. We also used functional genetics to assess the impact of  
108 several observed *katG* mutations on the INH minimum inhibitory concentration (MIC) of the pansusceptible  
109 *Mtb* strain, H37Rv.

114

115

## 116 **Materials and Methods**

117 **Bacterial strains, plasmids, and oligonucleotides.** All clinical isolates that met the criteria for study  
118 inclusion (**Figure 1**) are listed in **Table 1** and were evaluated for the presence of the *katG* S315T and *fabG1*-  
119 *inhA* t-8a, t-8c, c-15t, a-16g mutations by Hain Genotype MTBDR*plus* v2 LPA test or Sanger/pyrosequencing  
120 prior to this work. To determine the phylogenetic diversity of our study set, we performed single nucleotide  
121 polymorphism (SNP)-based analysis of all 52 genomes (**Table 1**; (32)) using our Unified Variant Pipeline  
122 (CDC, unpublished data). Recombineered strains were derived from the H37Rv wild-type parent strain and are  
123 listed in **Supplemental Table S1**. Plasmids and oligonucleotides used are listed in **Supplemental Table S2**.  
124 pJV128 (33) was provided by Graham F. Hatfull (University of Pittsburgh). All mycobacterial broth cultures  
125 were grown as described previously (34). This work was approved by the CDC Institutional Review Board  
126 (protocol 5411).

127 **INH DST and MIC determination.** All clinical strains were initially tested for INH susceptibility on  
128 Middlebrook 7H10 agar by the indirect agar proportion method as described by the Clinical and Laboratory  
129 Standards Institute (35). Resistance was defined as growth of >1% of the inoculum on a critical concentration of  
130 INH (0.2 µg/mL) as compared to a drug-free control. The MIC for INH was determined for all strains using the  
131 Sensititre MYCOTB MIC Plate (ThermoFisher Scientific) modified from a previous study (36). Briefly,  
132 Lowenstein-Jensen (LJ) slants were inoculated with 100 µL of frozen stock and incubated for no more than five  
133 weeks at 37°C. Growth was removed from the LJ slants with a pre-moistened sterile swab and resuspended in  
134 saline (0.8% w/v)/tween (0.2% v/v) solution with glass beads and briefly vortexed. The cell suspension was  
135 adjusted to a McFarland standard of ~0.5 and allowed to settle for 15 minutes. This suspension was diluted  
136 1:100 in 10 mL of Middlebrook 7H9 with OADC (Thermo Scientific). After vortexing, the dilution tubes were  
137 allowed to settle for five minutes to minimize aerosols. Each 7H9 dilution was poured into a sterile reservoir

138 and pipetted up and down three to four times to fully homogenize, then each well of the Sensititre plate was  
139 inoculated with 100  $\mu$ L of the cell suspension. Plates were sealed with adhesive film, sealed in a plastic bag,  
140 and incubated at 37°C. Plates were read for MIC values at 10 and 21 days post-inoculation using the Sensititre  
141 Vizion Digital MIC Viewing System (ThermoFisher Scientific). The MIC was recorded as the lowest antibiotic  
142 concentration that reduced visible growth as compared to the drug-free control wells. Bitmap picture files of  
143 each plate reading were captured by SWIN software and read for a second time by the same operator on a  
144 separate computer to verify initial results. All reported MICs represent the mode from at least three independent  
145 experiments.

146 **WGS and analysis.** MTBC strains were grown in Middlebrook 7H9 broth (6 mL) until culture turbidity  
147 was between OD<sub>600</sub> 0.4 and 1.0. When possible, 200  $\mu$ L of frozen stock were used instead of broth culture to  
148 minimize the chance of mutations occurring during *in vitro* growth. Genomic DNA was extracted using the ZR  
149 Fungal/Bacterial DNA MiniPrep Kit (Zymo), eluted in 25–30  $\mu$ L of elution buffer, and quantified using a Qubit  
150 dsDNA BR or HS Assay Kit (ThermoFisher Scientific). Genomic DNA was sheared to a target size of 800 bp  
151 using an M220 Focused-Ultrasonicator and Holder XTU (Covaris), and libraries were prepared (25 ng input  
152 DNA per sample) using the Ovation Ultralow v2 Kit (NuGen) according to the manufacturer's instructions.  
153 Libraries were pooled to 8 pM and sequenced on a MiSeq using the 500-Cycle MiSeq Reagent Kit v2  
154 (Illumina). Sequenced genomes had an average median coverage of 118x and Q30 scores of 80%–90%. FASTQ  
155 file output from the MiSeq sequencing runs was assembled to the H37Rv reference strain (NCBI accession  
156 number NC\_000962.3) using Lasergene SeqMan NGen (DNASTAR).

157 SNP calling and alignment parameters were set to default parameters in SeqMan NGen. Assemblies  
158 were visualized using Lasergene SeqMan Pro (DNASTAR). Single nucleotide polymorphisms (SNPs), small  
159 insertions/deletions (indels), and multi-kb indels were detected in SeqMan Pro using the SNP Report,  
160 Alignment View, Strategy View, Coverage Report, and Structural Variation Report tools. SNPs with a read  
161 depth <20 or a SNP % <25 were ignored. Trimmed sequences were aligned against H37Rv

162 (<https://www.ncbi.nlm.nih.gov/>; accession number NC\_000962.3) in BLAST  
163 (<https://blast.ncbi.nlm.nih.gov/Blast.cgi>) to determine the nature of insertions/deletions. Common INH-  
164 associated genes *katG* (*Rv1908c*), *inhA* (*Rv1484*), *furA* (*Rv1909c*), *fabG1* (*Rv1483*), *ahpC* (*Rv2428*), and other  
165 INH-associated loci found in the literature [*kasA* (*Rv2245*), *srmR* (*Rv2242*), *ndh* (*Rv1854c*), *iniB* (*Rv0341*), *iniA*  
166 (*Rv0342*), *iniC* (*Rv0343*), *Rv0340*, *nat* (*Rv3566c*), *Rv1592c*, *fadE24* (*Rv3139*), *Rv1772*, *efpA* (*Rv2846c*), *fabD*  
167 (*Rv2243*), *accD6* (*Rv2247*), or *fbpC* (*Rv0129*)(37)] were searched for modifications. To determine the  
168 approximate level of gene duplication in the PETTS-24 strain at the *ahpC* region, the highest and lowest points  
169 of coverage depth were located in SeqMan Pro's Strategy View and quantified in SeqMan Pro's Alignment  
170 View.

171 **Preparation of electrocompetent, recombinant *M. tuberculosis*.** H37Rv carrying the pJV128  
172 recombineering plasmid was generated previously (34) and was used as a recipient strain in recombineering  
173 experiments as described therein, with some modifications. 7H9-succinate broth was prepared as described in  
174 (38) but cyclohexamide and carbenicillin were omitted. Aliquots (~120  $\mu$ L) of electrocompetent cells were snap  
175 frozen in a dry ice/ethanol bath for three minutes and stored at  
176 -70°C until used.

177 **Recombineering oligo design and electroporation into H37Rv pJV128.** All oligos used to generate  
178 mutations of interest were designed to anneal to the lagging strand of the H37Rv genome and were compared  
179 against H37Rv reference sequence (<https://www.ncbi.nlm.nih.gov/>; accession number NC\_000962.3) to check  
180 for errors using BLAST (<https://blast.ncbi.nlm.nih.gov/Blast.cgi>). Oligos were ordered through Integrated DNA  
181 Technologies (IDT) in 100 nmole quantities with polyacrylamide gel electrophoresis (PAGE) purification.  
182 Experimental oligos were resuspended in molecular grade ddH<sub>2</sub>O to a concentration of 100  $\mu$ M, and a working  
183 stock was made at 5  $\mu$ M. The HygFix\_For oligo, which is required for repair of the double stop codon in the  
184 pJV128 hygromycin (Hyg) B phosphotransferase gene, was prepared at a working stock concentration of 1  $\mu$ M.  
185 One hundred ng of HygFix\_For and 500 ng of experimental oligo (~10  $\mu$ L total DNA volume) were premixed



186 then added to 100  $\mu$ L of room temperature electrocompetent cells. Reactions were electroporated on a Gene  
187 Pulser electroporator (Bio-Rad) under the following conditions: 2.5 kV, 1000 $\Omega$ , 25  $\mu$ F. After electroporation,  
188 all reactions were transferred to 1 mL of 7H9 broth and incubated shaking at 100 rpm for 48–72 hours to  
189 recover.

190 **Selection of plasmid-free recombinants for resistance-conferring mutations.** Recovery cultures were  
191 serially diluted and spread plated onto 7H10 agar containing either Hyg (50  $\mu$ g/mL) alone or Hyg (50  $\mu$ g/mL)  
192 plus INH (0.2  $\mu$ g/mL) to select for cells that were recombinant and had repaired the double stop codon mutation  
193 in *hygS<sub>amber</sub>* on the pJV128 plasmid (Hyg only), or that had also gained an INH resistance-conferring mutation  
194 (Hyg+INH). Plates were incubated for three to four weeks before counting colonies. To allow for growth of  
195 cells that lost the pJV128 plasmid, four to ten colonies were picked from the 7H10 Hyg<sup>50</sup>+INH<sup>0.2</sup> plates for each  
196 mutation and resuspended in 150  $\mu$ L of plain 7H9 broth in a polystyrene 96-well plate. These plates were  
197 incubated for approximately one week, or until all wells were turbid. Thirty  $\mu$ L from each well were serially  
198 diluted in plain 7H9 broth and plated onto 7H10 agar containing 10% (v/v) sucrose. DNA was extracted from  
199 the remaining culture from each well and analyzed by Illumina WGS to check for i) the desired mutation and ii)  
200 the absence of confounding mutations and plasmid.

201 **Accession numbers.** The MTBC clinical strain WGS data presented in this report is accessible at the  
202 Sequence Read Archive under accession number SRP137013 (<https://www.ncbi.nlm.nih.gov/sra/SRP137013>)  
203 and at BioProject under the accession number PRJNA448595  
204 (<http://www.ncbi.nlm.nih.gov/bioproject/448595>).

209

210

211

212

213

## 214 **Results**

215 **Selection of strains with discordant INH molecular and phenotypic results.** We used clinical MTBC  
216 strains from previous studies stored in CDC's Division of Tuberculosis Elimination Laboratory Branch to look  
217 for mutations that might explain discordant INH resistance test results. To build our study set, we evaluated  
218 1278 international MDR-, pre-XDR-, and XDR-TB strains from the PETTS archive (39), 212 INH-R strains  
219 from a previous drug resistance study (31), and 12 INH-R strains from recent submissions to the MDDR service  
220 offered at CDC. All strains were isolated from clinical specimens between the years 2000 and 2017. To be  
221 eligible for study inclusion, strains were required to be phenotypically resistant to INH but lack the *katG* S315T  
222 and *fabG1-inhA* promoter mutations (c-15t, a-16g, t-8c, and t-8a) as determined by the Hain Genotype  
223 MTBDR<sub>plus</sub> v2 LPA test or Sanger/pyrosequencing (61/1502 strains). Strains were also excluded if unable to  
224 recover from frozen stock, if they tested susceptible to INH by Sensititre, or if a common INH resistance  
225 mutation (mentioned above) was discovered by WGS (**Figure 1**). Fifty-two strains met the criteria for inclusion.  
226 After SNP-based phylogenetic analysis, we determined that 51/52 strains were *M. tuberculosis* and one strain  
227 was *M. bovis*. Thirteen out of the 51 *Mtb* strains were of the Indo-Oceanic lineage (L1), 20/51 were of the East-  
228 Asian lineage (L2), 1/51 was of the East-African-Indian lineage (L3), and 17/51 were of the Euro-American  
229 lineage (L4) (**Table 1**).

230 **MIC determination for each strain.** We determined the INH MIC for each strain using Trek Sensititre  
231 MYCOTB plates (**Table 1** and **Supplemental Dataset S1**). Given that the Sensititre INH MIC of H37Rv is

0.06 µg/mL and two-fold differences in serial dilution MIC assays are unlikely to be significant, we considered strains with an MIC  $\geq 0.25$  µg/mL to be INH-R. The majority of the strains (39/52) were highly resistant to INH (MIC  $\geq 2$  µg/mL). Of these, 29/39 were resistant to the highest concentration tested (4 µg/mL). The remaining strains (13/52) expressed low-level INH resistance (MIC  $\geq 0.25$  but  $\leq 1.00$  µg/mL).

**WGS analysis to determine mutations linked to INH-R phenotype.** In order to determine the genetic mechanisms leading to INH resistance in discordant strains of MTBC, we performed WGS on each of the clinical isolates. We reviewed available literature on INH resistance in MTBC (12-15, 18, 19, 22-24, 40-47) and works cited therein to deduce the most probable causes of this phenotype for each strain, which are listed in **Table 1**. Broadly, such mutations in our study set are predicted to decrease KatG activation of INH prodrug or overexpress/modify the target of active INH, *InhA*.

In 26/52 strains, the INH-R phenotype could be explained by loss of *katG* due to known resistance-conferring mutations such as large deletions that removed *katG* promoter(s) and/or ORF sequence (n=7; **Figure 2**); frameshifts (n=5), nonsense mutations (n=3), or S315N,G missense mutations in *katG* (n=2); and the *fabG1* L203L mutation (n=9). Most (6/9) of the *fabG1* L203L mutations co-occurred with *inhA* ORF missense mutations. In contrast, 23/52 strains' INH resistance was likely due to uncommon missense mutations in *katG* (n=21), a small indel in *katG* (n=1), or a missense mutation in *inhA* (n=1). Though these mutations are not yet considered high-confidence INH resistance markers, we were able to find supporting evidence for most of them as INH resistance determinants in the literature (see footnotes in **Table 1**) or validate them by functional genetics in *Mtb* (see below). The *katG* R463L mutation was also present in 33/52 strains, however this polymorphism is known to be a phylogenetic marker (32) and does not confer INH resistance (48). In 3/52 strains, no changes occurred that could readily explain the INH-R phenotype (**Table 1** and **Supplemental Table S3**).

In addition to at least one probable INH resistance conferring mutation, 29/52 strains also carried *ahpC* promoter mutations. None of the clinical strains in our study set carried *ahpC* promoter mutations in isolation.

256 One strain, PETTS-24, even appeared to encode a novel mechanism for *ahpC* overexpression: upon visual  
257 analysis of WGS data, PETTS-24 had an overabundance of reads from nucleotides 2717792-2727891 (10.1 kb),  
258 which includes the *oxyR'-ahpC-ahpD* region. On average, reads mapping to just the *ahpC* ORF were ~8–11x  
259 more abundant than the median genome coverage. We noted that reads at each end of the 10.1 kb  
260 overrepresented region had unaligned nucleotides which shared homology with genome sequence flanking the  
261 opposite end of the overrepresented region 10.1 kb away, suggesting a possible tandem array (49).

262 **Rare and unprecedented mutations in *katG* tested individually for their role in**  
263 **INH resistance.** As mentioned above, 23/52 clinical strains encoded uncommon mutations in INH-associated  
264 loci which have not been directly shown (e.g., by functional genetic experiments) to confer INH resistance. To  
265 determine if previously unexamined *katG* mutations in our study set conferred INH resistance in a susceptible  
266 background, we attempted—by recombineering (50)—to generate 16 unique mutations in the *katG* open reading  
267 frame. Of these, 6/16 mutations have been previously reported in INH-R clinical isolates (*katG* V1A, N138S,  
268 W300R, S315G, S315N, W328R), 8/16 mutations are unprecedented in the literature (W161Q, W161R,  
269 E402stop, L415P, A480del, G601delins\_GG, A606P, N701D), and 2/16 were controls to confirm the efficacy  
270 of the recombineering method for our purposes (W107stop, S315T).

271 The *katG* mutations V1A, N138S, W161Q, W161R, W300R, S315G, S315N, S315T, W328R,  
272 E402stop, L415P, and A480del were successfully generated in the H37Rv background. In contrast, we were  
273 unable to generate the *katG* mutations W107stop, G601delins\_GG, A606P, and N701D. Instead, these desired  
274 mutations were either coupled with a second mutation within *katG* or did not occur at all (data not shown).  
275 During the recombineering process, we also unintentionally generated a *katG* A110V mutant, which we  
276 included in subsequent studies. Prior to MIC testing, we closely analyzed the SNP reports for recombineered  
277 strains to ensure that no confounding mutations were present that could impact INH resistance. Of the seven  
278 unintentional SNPs we observed in 8/13 recombineered strains, none of them occurred within 2,000 bp of any  
279 INH-associated locus. Six of these seven SNPs were either intergenic or encoded synonymous mutations. The

280 single nonsynonymous SNP, encoding a *fadD12* Q471R mutation, was detected in only one of the *katG* S315T  
281 clones. Since the *katG* S315T is already thoroughly established as an INH resistance mutation and was included  
282 as positive control, we concluded that the SNP in *fadD12* would have no bearing on our experimental results.  
283 Thus, we considered all clones of our recombineered H37Rv *katG* mutants to be free from confounding  
284 mutations that might impact DST MICs.

285 INH MICs for each recombineered H37Rv *katG* mutant are shown in **Table 2**. Recombineered strain  
286 MICs for other anti-TB drugs included on the Sensititre MYCOTB plate did not differ significantly from those  
287 of the H37Rv parent strain ( $\leq 2$ -fold change) which suggests that the increased drug resistance conferred by  
288 recombineered mutations was specific to INH (data not shown). Not including the H37Rv S315T control, eight  
289 *katG* mutants had high-level INH resistance (MIC  $\geq 2$   $\mu\text{g/mL}$ ) and four *katG* mutants had low-level INH  
290 resistance (MIC  $\geq 0.25$  and  $\leq 1.00$   $\mu\text{g/mL}$ ). To our knowledge, five of the mutations listed in **Table 2** (*katG*  
291 W161Q, W161R, E402stop, L415P, and A480del) have not been previously reported.

292 Generally, the degree of INH resistance conferred by each *katG* mutation was consistent between  
293 recombineered mutants and their corresponding clinical strains (**Table 2**), though we note that clinical strains  
294 often had additional INH associated mutations that prevent making a clear comparison. Strangely, the *katG*  
295 W161R and S315N mutations conferred high-level resistance in H37Rv but not in their respective clinical  
296 strains, PETTS-29 and PETTS-5. PETTS-5 additionally encodes a *katG* S140N mutation (51) and both of these  
297 clinical strains encode a *katG* R463L mutation, which is a known phylogenetic marker (32). It is not clear if  
298 these or other coincident benign mutations can ameliorate the effects of INH-R mutations in *katG*.

299 **Clinical strains that did not encode any predicted resistance mutations in *furA*, *katG*, *fabG1*, *inhA*,**  
300 **or *ahpC* or had mixed *katG* alleles.** We explored the genome sequences of these “unexplained” strains further  
301 to determine if other, more obscure mutations related to INH resistance were present. Briefly, we found changes  
302 in 13 different genes among the three unexplained strains that might reduce INH susceptibility based on the  
303 literature (*accE5*, *efpA*, *mmpL7*, *msrA*, *mymA*, *pknH*, *pknK*, *pks8*, *nuoC*, *nuoG*, *nuoM*, *Rv1592c*,

304 *sdh1A/Rv0248c*). Notable mutations include i) a large indel ~110 bp upstream from the operon encoding the  
305 EfpA MFS-type efflux pump, ii) SNPs upstream of the *mmpL7* gene, which could impact expression of the  
306 encoded INH efflux pump, and iii) a large deletion in *msrA*, whose encoded methionine sulfoxide reductase  
307 uses up NAD(P)H which could impact competition between NAD(P)H and INH-NAD adduct for InhA binding.  
308 **Supplemental Table S3** summarizes all mutations of interest for these three strains and our rationale for  
309 suggesting a connection to INH resistance. Since we did not test any of these mutations individually, these  
310 strains will require further investigation before the specific mechanism(s) conferring their INH resistance can be  
311 determined. A fourth strain, RLT-2, had a heterogeneous population of *katG* reads suggesting a mixed sampling  
312 of *Mtb* bacilli from a single patient. Two separate single bp deletions were observed in *katG* that would likely  
313 eliminate protein function via frameshift [37/108 (34%) reads at nt position 2155969 encoding a L48fs mutation  
314 and 44/120 (37%) reads at nt position 2155581 encoding a G177fs mutation].

325

326

327

328

329

330

### 331 **Discussion**

332 In this study, we observed phenotypic INH resistance among MTBC clinical strains lacking the common  
333 mutations *katG* S315T and *fabG1-inhA* t-8a, t-8c, c-15t, a-16g. Early detection of less common INH resistance  
334 mutations could allow patients to be placed on appropriate therapy more rapidly and decrease the chances of  
335 treatment failure and acquired drug resistance. For our study set, the results demonstrate that INH resistance  
336 mutations not detected by conventional molecular methods could have been detected in 94% (49/52) of study  
337 set strains by expanding regions examined for *fabG1-inhA* and *katG* and accounting for large deletions that  
338 include *katG* and/or its promoters. An illustration summarizing INH resistance mutations confirmed previously  
339 in *Mtb*, and those described in this work, is presented in **Figure 3**.

340 Although conventional molecular tests such as LPAs are rapid and specific, a recent meta-analysis found  
341 that the sensitivity of the Genotype MTBDRplus (Hain Lifescience) for the detection of INH resistance is  
342 highly variable depending on the study, and that pooled sensitivity across all included studies was only 83.4%  
343 (52). Even with the added sensitivity of targeted Sanger/pyrosequencing of the regions around *katG* S315 and  
344 the *inhA* promoter, it is likely that at least 9–10% of INH-R MTBC will be missed by these methods (31, 53).  
345 While small mutations such as SNPs or short indels could theoretically be detected by designing more  
346 comprehensive sequencing primers or adding mutation probes to future LPAs, these measures would require

347 continual rounds of validation and would need periodic adjustment as new resistance determinants emerge.  
348 Larger mutations, like the multi-kb deletions we observed that are predicted to reduce or eliminate *katG*  
349 expression, would be even less practical to target with conventional methods due to the variability of their start  
350 and stop sites. Therefore, WGS is likely to be the foremost molecular DST method that can reliably detect all  
351 currently known and yet-to-be determined INH resistance mutations.

352 The *oxyR'-ahpC* intergenic region is another important locus associated with INH-R MTBC, though it is  
353 not targeted by either of the WHO-recommended LPAs. A recent meta-analysis of INH resistance mutations in  
354 clinical isolates found that among 24 publications released between the years 2000 and 2013 that reported  
355 sequencing the *ahpC* promoter region, the cumulative frequency of *ahpC* promoter mutations in INH-  
356 susceptible strains was 1.31%, but in INH-R strains was 8.88% (14). This lends support to the idea that some  
357 *ahpC* promoter mutations may be important markers of INH resistance (24, 54). It is interesting to note that  
358 56% (29/52) of strains in our study set—which exclusively contains uncommon INH resistance markers—  
359 encoded changes to the *ahpC* promoter region. While we acknowledge that our study set was much smaller (52  
360 strains) than that examining *ahpC* promoter mutations in the Seifert et al. study [~3000 strains; (14)], our results  
361 correlate *ahpC* promoter changes and INH resistance markers outside of *katG* S315T or the *inhA* promoter.  
362 Previous reports have also noted the association of *ahpC* promoter mutations with uncommon INH resistance  
363 genotypes (55, 56). We are currently working on generating some of the clinical *ahpC* promoter mutations from  
364 this study and hope the results of those experiments will bring clarity to the longstanding questions surrounding  
365 the importance of the AhpC alkylhydroperoxidase for evolution of INH resistance.

366 Notably, our WGS data for strain PETTS-24 revealed that SNPs and small indels are not the only  
367 mechanism by which *ahpC-ahpD* can be overexpressed. To our knowledge, this is the first reported instance of  
368 *ahpC* overexpression due to a predicted gene amplification event (57) resulting in a tandem array. However, it  
369 is possible that previous reports of *ahpC* overexpression in the absence of observable promoter mutations are  
370 due to a similar phenomenon. In *Mtb*, gene duplication events have been seen before (58-60), but to our



371 knowledge are restricted to duplications and do not involve *ahpC*. No information regarding amplifications  
372 approaching 10x were found in the literature. Further investigation will be required to fully characterize this  
373 novel method of *ahpC* overexpression.

374 In total, our functional genetics experiments have confirmed the role of seven mutations in INH  
375 resistance and discovered five novel INH resistance mutations. However, we were unable to generate the *katG*  
376 G601delins\_GG, A606P, and N701D mutations, suggesting that these mutations are unlikely to confer INH  
377 resistance. The failed recombinant clones frequently encoded a frameshift within 10 codons of the desired  
378 mutation in *katG* at positions that would fall within the recombineering oligo annealing site. We suspect that  
379 such frameshifts explain growth on INH selection during the recombineering process. Since the clinical strains  
380 encoding *katG* G601delins\_GG (net result: an in-frame insertion of a codon encoding glycine), A606P, and  
381 N701D changes also had secondary mutations associated with INH resistance in the literature or that were  
382 shown to confer INH resistance in this work (*katG* W300R, W328R, D573G), we suspect G601delins\_GG,  
383 A606P, and N701D are benign. However, there were no alternative mutations leading to INH resistance in the  
384 clinical strain with the *katG* W107stop mutation. It is not clear why the *katG* W107stop mutation could not be  
385 recombineered, though we note it has only been observed in the presence of *ahpC* promoter mutations [this  
386 work; (61)].

387 The recombineered *katG* mutations V1A, A110V, N138S, W161Q, W161R, W300R, S315G, S315N,  
388 S315T (positive control), W328R, E402stop, L415P, and A480del all independently conferred INH resistance  
389 in H37Rv. For the V1A and E402stop mutations, resistance was not surprising given that a GTG→GCG  
390 mutation would not be recognized as a start codon (62) and a nonsense mutation even at *katG* codon 454 was  
391 associated with complete loss of catalase activity (63). Likewise, N138S, W300R, S315G, S315N, W328R were  
392 also expected to increase the INH MIC since mutations at all of those residues are associated with decreased  
393 INH-NADH adduct (active drug) formation in biochemical studies of KatG enzyme (40). Notably, the W161Q,

394 W161R, E402stop, L415P, and A480del mutations were not reported in the literature and A110V has only been  
395 reported in the presence of other confounding mutations (43, 64).

396 Since frameshift mutations occurred throughout *katG* in our INH-R failed recombinants, this  
397 observation taken together with our clinical and recombineered mutant data strongly supports the notion that  
398 targeted molecular DST methods should scan the entire *katG* ORF. The current model of exclusively using  
399 molecular diagnostics to target INH resistance mutations inside of “hotspots” may ultimately select for clinical  
400 strains that have non-canonical INH resistance mutations by depleting those with common ones from the host  
401 population. This scenario was already hypothesized by Torres and colleagues, who found >20 clinical *katG*  
402 mutations outside codon S315 by WGS of and used site-directed mutagenesis to show that several could  
403 independently confer INH resistance to *Mycobacterium smegmatis* (43). There is evidence to suggest that the  
404 rise of non-canonical INH resistance mutations is already happening in India, where there is a high burden of  
405 drug-resistant TB (65). WGS or expanded targeted sequencing could be used to detect such mutations.

406 Interestingly, 6% (3/52) of our study set strains expressed INH resistance that could not be explained by  
407 any known mechanisms. Upon WGS analysis, changes to genes implicated in INH efflux activity, cell wall  
408 composition, dormancy, redox control, and post-translational regulation of INH targets were observed  
409 (**Supplemental Table S3**). While we have yet to investigate any of these possible new INH resistance  
410 determinants by functional genetic experiments, our data suggest that future molecular tests may need to look  
411 outside of the known INH-associated genes (*furA*, *katG*, *fabG1*, *inhA*, *ahpC*, etc.) if all INH resistance is to be  
412 reliably detected. These results also demonstrate the utility of WGS for retrospective analysis of strains and  
413 validation of new resistance loci.

414 Knowledge of specifically low-level INH resistance mutations may allow for inclusion of high dose INH  
415 within a treatment regimen and limit cases where first-line therapy is not indicated. For example, the *katG*  
416 A110V, W161Q, W300R, and S315G mutations (MIC  $\geq 0.25$  but  $\leq 1.00$   $\mu\text{g/mL}$ ; **Table 2**), should (in the absence  
417 of other INH resistance determinants) allow for expanded treatment options. Indeed, the WHO updated their

418 treatment guidelines for drug-resistant TB in 2016 to include high-dose INH for rifampin-resistant TB and  
419 MDR-TB in patients without suspected or confirmed high-level INH resistance (66). Thus, our finding that  
420 certain *katG* missense mutations by themselves confer only low-level INH resistance argues against a blanket  
421 policy removing INH from drug regimens in all cases of *katG* mutant TB.

422 **Conclusions.** In summary, we have shown that clinical MTBC strains may express INH resistance in the  
423 absence of mutations targeted by conventional rapid molecular tests (LPAs, targeted sequencing). We  
424 demonstrated that INH resistance can be predicted in such strains using WGS. Several unproven and unreported  
425 mutations in *katG* were generated in the H37Rv genetic background and shown to independently confer low- or  
426 high-level INH resistance in *Mtb* using functional genetics. Our approach could be easily adapted to clarify  
427 resistance mechanisms for other drugs. Going forward, WGS or expansion of targeted sequencing will be  
428 crucial for rapidly detecting INH-R MTBC missed by conventional molecular methods.

439

440

441

442

443

444

445

446 **Acknowledgements**

447 Use of trade names is for identification only and does not constitute endorsement by the US Department of  
448 Health and Human Services, the US Public Health Service, or the Centers for Disease Control and Prevention.  
449 The findings and conclusions in this report are those of the authors and do not necessarily represent the views of  
450 the Centers for Disease Control and Prevention. We thank the patients who gave their time and energy to  
451 contribute to this study, the clinical and microbiological staff at each of the enrollment sites in the PETTS study,  
452 and finally the public health professionals (CDC, Division of Tuberculosis Elimination, Laboratory Branch,  
453 Reference Laboratory Team) who archived and examined the clinical samples in the Mycobacteriology  
454 Laboratory Branch (MLB) and MDDR collections for their contributions to this work. We would also like to  
455 thank Melisa J. Willby and Glenn P. Morlock (CDC, Division of Tuberculosis Elimination, Laboratory Branch)  
456 for their excellent technical expertise with growth and extraction of DNA from MTBC bacteria, in addition to  
457 use of the Sensititre MYCOTB assay for DST, and Heather L. Alexander for her assistance with preliminary  
458 rapid molecular testing of clinical strains by line probe assay.

459 The Global PETTS Investigators include: Martie van der Walt, Jeannette Brand, South Africa Medical Research  
460 Council, Pretoria, South Africa; Thelma Tupasi, Janice Caoili, M. Tarcela Gler, Tropical Disease Foundation,

461 Manila, Philippines; Carmen Contreras, Martin Yagui, Jaime Bayona, Socios en Salud Sucursal, Lima, Peru;  
462 Vaira Leimane, Liga Kuksa, Girts Skenders, State Infectology Centre of Latvia, TB and Lung Disease Clinic,  
463 Riga, Latvia; Laura E. Via, National Institutes of Allergy and Infectious Diseases, Bethesda, MD, USA; Soo  
464 Hee Hwang, National Masan Tuberculosis Hospital, Masan, Republic of Korea; Grigory V. Volchenkov,  
465 Tatiana Somova, Vladimir Oblast Tuberculosis Dispensary, Vladimir, Russian Federation; Somsak Akksilp,  
466 Wanpen Wattanaamornkiet, Wanlaya Sitti, Ministry of Public Health, Bangkok, Thailand; Hee Jin Kim, Chang-  
467 ki Kim, Korea Institute of Tuberculosis, Seoul, Republic of Korea; Boris Y. Kazenny, Elena Kiryanova,  
468 Evgeniya Nemtsova, Orel Oblast Tuberculosis Dispensary, Orel, Russian Federation; Kai Kliiman, Tiina  
469 Kummik; Tartu University Lung Hospital, Tartu, Estonia; Piret Viiklepp, National TB Registry, Tallinn,  
470 Estonia; Ruwen Jou, Taiwan Centers for Disease Control and National TB Reference Laboratory, Taipei,  
471 Taiwan; Olga V. Demikhova, Larysa Chernousova, Central Tuberculosis Research Institute, Russian Academy  
472 of Medical Sciences, Moscow, Russian Federation; Ekaterina Kurbatova, Julia Ershova, Charlotte Kvasnovsky,  
473 Michael P. Chen, Melanie Wolfgang, U.S. Centers for Disease Control and Prevention, Atlanta, GA, USA.

474

475

476

477

478

479

480

481

482

483

484

485

486

487

488

489 **Funding Information**

490 This project was supported in part by an appointment to the Research Participation Program at the  
491 Division of Tuberculosis Elimination (Laboratory Branch) in the National Center for HIV/AIDS, Viral  
492 Hepatitis, STD, and TB Prevention, Centers for Disease Control and Prevention, administered by the Oak Ridge  
493 Institute for Science and Education through an interagency agreement between the US Department of Energy  
494 and CDC. Matthew N. Ezewudo received support from a grant funded by the Bill & Melinda Gates Foundation,  
495 award number OPP1115887. PETTS clinical strains were derived from a study (39) funded by the US Agency  
496 for International Development, US Centers for Disease Control and Prevention, and US National Institute of  
497 Allergy and Infectious Diseases.

498

499

500

501

502

503

504

505

506

507

508

509

510

511

512

513 **References**

- 514 1. WHO. 2017. Global Tuberculosis Report.  
515 <http://apps.who.int/iris/bitstream/10665/259366/1/9789241565516-eng.pdf?ua=1>. Accessed November  
516 16, 2017.
- 517 2. IHME. 2015. Financing Global Health 2014: Shifts in Funding as the MDG Era Closes.  
518 [http://www.healthdata.org/sites/default/files/files/policy\\_report/2015/FGH2014/IHME\\_PolicyReport\\_FGH\\_2014\\_1.pdf](http://www.healthdata.org/sites/default/files/files/policy_report/2015/FGH2014/IHME_PolicyReport_FGH_2014_1.pdf). Accessed November 16th, 2017.
- 519 3. WHO. 2015. Global Tuberculosis Report. [http://www.who.int/tb/publications/global\\_report/en/](http://www.who.int/tb/publications/global_report/en/).  
520 Accessed September 7th, 2016.
- 521 4. Takayama K, Wang L, David HL. 1972. Effect of isoniazid on the in vivo mycolic acid synthesis, cell  
522 growth, and viability of Mycobacterium tuberculosis. Antimicrob Agents Chemother 2:29-35.
- 523 5. Nahid P, Dorman SE, Alipanah N, Barry PM, Brozek JL, Cattamanchi A, Chaisson LH, Chaisson RE,  
524 Daley CL, Grzemska M, Higashi JM, Ho CS, Hopewell PC, Keshavjee SA, Lienhardt C, Menzies R,  
525 Merrifield C, Narita M, O'Brien R, Peloquin CA, Raftery A, Saukkonen J, Schaaf HS, Sotgiu G, Starke  
526 JR, Migliori GB, Vernon A. 2016. Official American Thoracic Society/Centers for Disease Control and  
527 Prevention/Infectious Diseases Society of America Clinical Practice Guidelines: Treatment of Drug-  
528 Susceptible Tuberculosis. Clin Infect Dis 63:e147-e195.
- 529

- 530 6. WHO. 2018. Latent tuberculosis infection: Updated and consolidated guidelines for programmatic  
531 management. [http://apps.who.int/iris/bitstream/handle/10665/260233/9789241550239-](http://apps.who.int/iris/bitstream/handle/10665/260233/9789241550239-eng.pdf;jsessionid=3991C5ADD5F3F12C489193C71F88555E?sequence=1)  
532 [eng.pdf;jsessionid=3991C5ADD5F3F12C489193C71F88555E?sequence=1](http://apps.who.int/iris/bitstream/handle/10665/260233/9789241550239-eng.pdf;jsessionid=3991C5ADD5F3F12C489193C71F88555E?sequence=1). Accessed April 19th, 2018.
- 533 7. WHO. 2015. WHO Model List of Essential Medicines.  
534 [http://www.who.int/medicines/publications/essentialmedicines/EML\\_2015\\_FINAL\\_amended\\_NOV201](http://www.who.int/medicines/publications/essentialmedicines/EML_2015_FINAL_amended_NOV2015.pdf?ua=1)  
535 [5.pdf?ua=1](http://www.who.int/medicines/publications/essentialmedicines/EML_2015_FINAL_amended_NOV2015.pdf?ua=1). Accessed May 8th, 2017.
- 536 8. WHO. 2015. WHO Model List of Essential Medicines for Children.  
537 [http://www.who.int/medicines/publications/essentialmedicines/EMLc\\_2015\\_FINAL\\_amended\\_AUG20](http://www.who.int/medicines/publications/essentialmedicines/EMLc_2015_FINAL_amended_AUG2015.pdf?ua=1)  
538 [15.pdf?ua=1](http://www.who.int/medicines/publications/essentialmedicines/EMLc_2015_FINAL_amended_AUG2015.pdf?ua=1). Accessed May 8th, 2017.
- 539 9. CDC. 2016. Core Curriculum on Tuberculosis.  
540 <http://www.cdc.gov/tb/education/corecurr/pdf/chapter6.pdf>. Accessed May 8th, 2017.
- 541 10. Jenkins HE, Zignol M, Cohen T. 2011. Quantifying the burden and trends of isoniazid resistant  
542 tuberculosis, 1994-2009. PLoS One 6:e22927.
- 543 11. Gegia M, Winters N, Benedetti A, van Soolingen D, Menzies D. 2017. Treatment of isoniazid-resistant  
544 tuberculosis with first-line drugs: a systematic review and meta-analysis. Lancet Infect Dis 17:223-234.
- 545 12. Manson AL, Cohen KA, Abeel T, Desjardins CA, Armstrong DT, Barry CE, 3rd, Brand J, Consortium  
546 TBGG, Chapman SB, Cho SN, Gabrielian A, Gomez J, Jodals AM, Joloba M, Jureen P, Lee JS, Malinga  
547 L, Maiga M, Nordenberg D, Noroc E, Romancenco E, Salazar A, Ssenogooba W, Velayati AA, Winglee  
548 K, Zalutskaya A, Via LE, Cassell GH, Dorman SE, Ellner J, Farnia P, Galagan JE, Rosenthal A, Crudu  
549 V, Homorodean D, Hsueh PR, Narayanan S, Pym AS, Skrahina A, Swaminathan S, Van der Walt M,  
550 Alland D, Bishai WR, Cohen T, Hoffner S, Birren BW, Earl AM. 2017. Genomic analysis of globally  
551 diverse Mycobacterium tuberculosis strains provides insights into the emergence and spread of  
552 multidrug resistance. Nat Genet 49:395-402.
- 553 13. Vilcheze C, Jacobs WR, Jr. 2014. Resistance to Isoniazid and Ethionamide in Mycobacterium  
554 tuberculosis: Genes, Mutations, and Causalities. Microbiol Spectr 2:MGM2-0014-2013.



- 555 14. Seifert M, Catanzaro D, Catanzaro A, Rodwell TC. 2015. Genetic mutations associated with isoniazid  
556 resistance in *Mycobacterium tuberculosis*: a systematic review. *PLoS One* 10:e0119628.
- 557 15. Wengenack NL, Uhl JR, St Amand AL, Tomlinson AJ, Benson LM, Naylor S, Kline BC, Cockerill FR,  
558 3rd, Rusnak F. 1997. Recombinant *Mycobacterium tuberculosis* KatG(S315T) is a competent catalase-  
559 peroxidase with reduced activity toward isoniazid. *J Infect Dis* 176:722-7.
- 560 16. Pym AS, Saint-Joanis B, Cole ST. 2002. Effect of *katG* mutations on the virulence of *Mycobacterium*  
561 *tuberculosis* and the implication for transmission in humans. *Infect Immun* 70:4955-60.
- 562 17. Vilcheze C, Wang F, Arai M, Hazbon MH, Colangeli R, Kremer L, Weisbrod TR, Alland D, Sacchettini  
563 JC, Jacobs WR, Jr. 2006. Transfer of a point mutation in *Mycobacterium tuberculosis inhA* resolves the  
564 target of isoniazid. *Nat Med* 12:1027-9.
- 565 18. Richardson ET, Lin SY, Pinsky BA, Desmond E, Banaei N. 2009. First documentation of isoniazid  
566 reversion in *Mycobacterium tuberculosis*. *Int J Tuberc Lung Dis* 13:1347-54.
- 567 19. Bergval IL, Schuitema AR, Klatser PR, Anthony RM. 2009. Resistant mutants of *Mycobacterium*  
568 *tuberculosis* selected in vitro do not reflect the in vivo mechanism of isoniazid resistance. *J Antimicrob*  
569 *Chemother* 64:515-23.
- 570 20. Zhang Y, Heym B, Allen B, Young D, Cole S. 1992. The catalase-peroxidase gene and isoniazid  
571 resistance of *Mycobacterium tuberculosis*. *Nature* 358:591-3.
- 572 21. Ando H, Kitao T, Miyoshi-Akiyama T, Kato S, Mori T, Kirikae T. 2011. Downregulation of *katG*  
573 expression is associated with isoniazid resistance in *Mycobacterium tuberculosis*. *Mol Microbiol*  
574 79:1615-28.
- 575 22. Siu GK, Yam WC, Zhang Y, Kao RY. 2014. An upstream truncation of the *furA-katG* operon confers  
576 high-level isoniazid resistance in a *Mycobacterium tuberculosis* clinical isolate with no known  
577 resistance-associated mutations. *Antimicrob Agents Chemother* 58:6093-100.
- 578 23. Ando H, Miyoshi-Akiyama T, Watanabe S, Kirikae T. 2014. A silent mutation in *mabA* confers  
579 isoniazid resistance on *Mycobacterium tuberculosis*. *Mol Microbiol* 91:538-47.

- 580 24. Unissa AN, Subbian S, Hanna LE, Selvakumar N. 2016. Overview on mechanisms of isoniazid action  
581 and resistance in Mycobacterium tuberculosis. *Infect Genet Evol* 45:474-492.
- 582 25. Ling DI, Zwerling AA, Pai M. 2008. Rapid diagnosis of drug-resistant TB using line probe assays: from  
583 evidence to policy. *Expert Rev Respir Med* 2:583-8.
- 584 26. Sanger F, Nicklen S, Coulson AR. 1977. DNA sequencing with chain-terminating inhibitors. *Proc Natl  
585 Acad Sci U S A* 74:5463-7.
- 586 27. Ronaghi M, Uhlen M, Nyren P. 1998. A sequencing method based on real-time pyrophosphate. *Science*  
587 281:363, 365.
- 588 28. WHO. 2016. The use of molecular line probe assay for the detection of resistance to isoniazid and  
589 rifampicin: policy update. [http://apps.who.int/iris/bitstream/10665/250586/1/9789241511261-  
590 eng.pdf?ua=1](http://apps.who.int/iris/bitstream/10665/250586/1/9789241511261-eng.pdf?ua=1). Accessed May 5th, 2017.
- 591 29. Hillemann D, Rusch-Gerdes S, Richter E. 2007. Evaluation of the GenoType MTBDRplus assay for  
592 rifampin and isoniazid susceptibility testing of Mycobacterium tuberculosis strains and clinical  
593 specimens. *J Clin Microbiol* 45:2635-40.
- 594 30. Mitarai S, Kato S, Ogata H, Aono A, Chikamatsu K, Mizuno K, Toyota E, Sejimo A, Suzuki K, Yoshida  
595 S, Saito T, Moriya A, Fujita A, Sato S, Matsumoto T, Ano H, Suetake T, Kondo Y, Kirikae T, Mori T.  
596 2012. Comprehensive multicenter evaluation of a new line probe assay kit for identification of  
597 Mycobacterium species and detection of drug-resistant Mycobacterium tuberculosis. *J Clin Microbiol*  
598 50:884-90.
- 599 31. Campbell PJ, Morlock GP, Sikes RD, Dalton TL, Metchock B, Starks AM, Hooks DP, Cowan LS,  
600 Plikaytis BB, Posey JE. 2011. Molecular detection of mutations associated with first- and second-line  
601 drug resistance compared with conventional drug susceptibility testing of Mycobacterium tuberculosis.  
602 *Antimicrob Agents Chemother* 55:2032-41.

- 603 32. Coll F, McNerney R, Guerra-Assuncao JA, Glynn JR, Perdigao J, Viveiros M, Portugal I, Pain A,  
604 Martin N, Clark TG. 2014. A robust SNP barcode for typing *Mycobacterium tuberculosis* complex  
605 strains. *Nat Commun* 5:4812.
- 606 33. van Kessel JC. 2008. Recombineering in *Mycobacteria* Using *Mycobacteriophage* Proteins. Ph.D.  
607 University of Pittsburgh.
- 608 34. Reeves AZ, Campbell PJ, Willby MJ, Posey JE. 2015. Disparities in capreomycin resistance levels  
609 associated with the *rrs* A1401G mutation in clinical isolates of *Mycobacterium tuberculosis*. *Antimicrob*  
610 *Agents Chemother* 59:444-9.
- 611 35. Institute CaLS. 2011. Susceptibility testing of *Mycobacteria*, *Nocardiae*, and Other Aerobic  
612 *Actinomycetes*; Approved Standard--Second Edition.
- 613 36. Abuali MM, Katariwala R, LaBombardi VJ. 2012. A comparison of the Sensititre(R) MYCOTB panel  
614 and the agar proportion method for the susceptibility testing of *Mycobacterium tuberculosis*. *Eur J Clin*  
615 *Microbiol Infect Dis* 31:835-9.
- 616 37. Wilson M, DeRisi J, Kristensen HH, Imboden P, Rane S, Brown PO, Schoolnik GK. 1999. Exploring  
617 drug-induced alterations in gene expression in *Mycobacterium tuberculosis* by microarray hybridization.  
618 *Proc Natl Acad Sci U S A* 96:12833-8.
- 619 38. van Kessel JC, Hatfull GF. 2008. *Mycobacterial* recombineering. *Methods Mol Biol* 435:203-15.
- 620 39. Dalton T, Cegielski P, Akksilp S, Asencios L, Campos Caoili J, Cho SN, Erokhin VV, Ershova J, Gler  
621 MT, Kazenny BY, Kim HJ, Kliiman K, Kurbatova E, Kvasnovsky C, Leimane V, van der Walt M, Via  
622 LE, Volchenkov GV, Yagui MA, Kang H, Global PI, Akksilp R, Sitti W, Wattanaamornkiet W,  
623 Andreevskaya SN, Chernousova LN, Demikhova OV, Larionova EE, Smirnova TG, Vasilieva IA,  
624 Vorobyeva AV, Barry CE, 3rd, Cai Y, Shamputa IC, Bayona J, Contreras C, Bonilla C, Jave O, Brand J,  
625 Lancaster J, Odendaal R, Chen MP, Diem L, Metchock B, Tan K, Taylor A, Wolfgang M, Cho E, Eum  
626 SY, Kwak HK, et al. 2012. Prevalence of and risk factors for resistance to second-line drugs in people  
627 with multidrug-resistant tuberculosis in eight countries: a prospective cohort study. *Lancet* 380:1406-17.

- 628 40. Cade CE, Dlouhy AC, Medzihradzky KF, Salas-Castillo SP, Ghiladi RA. 2010. Isoniazid-resistance  
629 conferring mutations in *Mycobacterium tuberculosis* KatG: catalase, peroxidase, and INH-NADH  
630 adduct formation activities. *Protein Sci* 19:458-74.
- 631 41. Coll F, McNerney R, Preston MD, Guerra-Assuncao JA, Warry A, Hill-Cawthorne G, Mallard K, Nair  
632 M, Miranda A, Alves A, Perdigo J, Viveiros M, Portugal I, Hasan Z, Hasan R, Glynn JR, Martin N,  
633 Pain A, Clark TG. 2015. Rapid determination of anti-tuberculosis drug resistance from whole-genome  
634 sequences. *Genome Med* 7:51.
- 635 42. Sandgren A, Strong M, Muthukrishnan P, Weiner BK, Church GM, Murray MB. 2009. Tuberculosis  
636 drug resistance mutation database. *PLoS Med* 6:e2.
- 637 43. Torres JN, Paul LV, Rodwell TC, Victor TC, Amallraja AM, Elghraoui A, Goodmanson AP, Ramirez-  
638 Busby SM, Chawla A, Zadorozhny V, Streicher EM, Sirgel FA, Catanzaro D, Rodrigues C, Gler MT,  
639 Crudu V, Catanzaro A, Valafar F. 2015. Novel katG mutations causing isoniazid resistance in clinical  
640 *M. tuberculosis* isolates. *Emerg Microbes Infect* 4:e42.
- 641 44. Huang WL, Chen HY, Kuo YM, Jou R. 2009. Performance assessment of the GenoType MTBDRplus  
642 test and DNA sequencing in detection of multidrug-resistant *Mycobacterium tuberculosis*. *J Clin*  
643 *Microbiol* 47:2520-4.
- 644 45. Master S, Zahrt TC, Song J, Deretic V. 2001. Mapping of *Mycobacterium tuberculosis* katG promoters  
645 and their differential expression in infected macrophages. *J Bacteriol* 183:4033-9.
- 646 46. Zhang Y, Dhandayuthapani S, Deretic V. 1996. Molecular basis for the exquisite sensitivity of  
647 *Mycobacterium tuberculosis* to isoniazid. *Proc Natl Acad Sci U S A* 93:13212-6.
- 648 47. Nebenzahl-Guimaraes H, Jacobson KR, Farhat MR, Murray MB. 2014. Systematic review of allelic  
649 exchange experiments aimed at identifying mutations that confer drug resistance in *Mycobacterium*  
650 *tuberculosis*. *J Antimicrob Chemother* 69:331-42.
- 651 48. Rouse DA, Li Z, Bai GH, Morris SL. 1995. Characterization of the katG and inhA genes of isoniazid-  
652 resistant clinical isolates of *Mycobacterium tuberculosis*. *Antimicrob Agents Chemother* 39:2472-7.

- 653 49. Graham GJ. 1995. Tandem genes and clustered genes. *J Theor Biol* 175:71-87.
- 654 50. van Kessel JC, Hatfull GF. 2008. Efficient point mutagenesis in mycobacteria using single-stranded  
655 DNA recombineering: characterization of antimycobacterial drug targets. *Mol Microbiol* 67:1094-107.
- 656 51. Rouse DA, DeVito JA, Li Z, Byer H, Morris SL. 1996. Site-directed mutagenesis of the *katG* gene of  
657 *Mycobacterium tuberculosis*: effects on catalase-peroxidase activities and isoniazid resistance. *Mol*  
658 *Microbiol* 22:583-92.
- 659 52. Drobniowski F, Cooke M, Jordan J, Casali N, Mugwagwa T, Broda A, Townsend C, Sivaramakrishnan  
660 A, Green N, Jit M, Lipman M, Lord J, White PJ, Abubakar I. 2015. Systematic review, meta-analysis  
661 and economic modelling of molecular diagnostic tests for antibiotic resistance in tuberculosis. *Health*  
662 *Technol Assess* 19:1-188, vii-viii.
- 663 53. Yakrus MA, Driscoll J, Lentz AJ, Sikes D, Hartline D, Metchock B, Starks AM. 2014. Concordance  
664 between molecular and phenotypic testing of *Mycobacterium tuberculosis* complex isolates for  
665 resistance to rifampin and isoniazid in the United States. *J Clin Microbiol* 52:1932-7.
- 666 54. Deretic V, Philipp W, Dhandayuthapani S, Mudd MH, Curcic R, Garbe T, Heym B, Via LE, Cole ST.  
667 1995. *Mycobacterium tuberculosis* is a natural mutant with an inactivated oxidative-stress regulatory  
668 gene: implications for sensitivity to isoniazid. *Mol Microbiol* 17:889-900.
- 669 55. Casali N, Nikolayevskyy V, Balabanova Y, Harris SR, Ignatyeva O, Kontsevaya I, Corander J, Bryant J,  
670 Parkhill J, Nejentsev S, Horstmann RD, Brown T, Drobniowski F. 2014. Evolution and transmission of  
671 drug-resistant tuberculosis in a Russian population. *Nat Genet* 46:279-86.
- 672 56. Hazbon MH, Brimacombe M, Bobadilla del Valle M, Cavatore M, Guerrero MI, Varma-Basil M,  
673 Billman-Jacobe H, Lavender C, Fyfe J, Garcia-Garcia L, Leon CI, Bose M, Chaves F, Murray M,  
674 Eisenach KD, Sifuentes-Osornio J, Cave MD, Ponce de Leon A, Alland D. 2006. Population genetics  
675 study of isoniazid resistance mutations and evolution of multidrug-resistant *Mycobacterium*  
676 *tuberculosis*. *Antimicrob Agents Chemother* 50:2640-9.

- 677 57. Sandegren L, Andersson DI. 2009. Bacterial gene amplification: implications for the evolution of  
678 antibiotic resistance. *Nat Rev Microbiol* 7:578-88.
- 679 58. Domenech P, Kolly GS, Leon-Solis L, Fallow A, Reed MB. 2010. Massive gene duplication event  
680 among clinical isolates of the *Mycobacterium tuberculosis* W/Beijing family. *J Bacteriol* 192:4562-70.
- 681 59. Weiner B, Gomez J, Victor TC, Warren RM, Sloutsky A, Plikaytis BB, Posey JE, van Helden PD, Gey  
682 van Pittius NC, Koehrsen M, Sisk P, Stolte C, White J, Gagneux S, Birren B, Hung D, Murray M,  
683 Galagan J. 2012. Independent large scale duplications in multiple *M. tuberculosis* lineages overlapping  
684 the same genomic region. *PLoS One* 7:e26038.
- 685 60. Domenech P, Rog A, Moolji JU, Radomski N, Fallow A, Leon-Solis L, Bowes J, Behr MA, Reed MB.  
686 2014. Origins of a 350-kilobase genomic duplication in *Mycobacterium tuberculosis* and its impact on  
687 virulence. *Infect Immun* 82:2902-12.
- 688 61. Baker LV, Brown TJ, Maxwell O, Gibson AL, Fang Z, Yates MD, Drobniowski FA. 2005. Molecular  
689 analysis of isoniazid-resistant *Mycobacterium tuberculosis* isolates from England and Wales reveals the  
690 phylogenetic significance of the *ahpC* -46A polymorphism. *Antimicrob Agents Chemother* 49:1455-64.
- 691 62. Cole ST, Brosch R, Parkhill J, Garnier T, Churcher C, Harris D, Gordon SV, Eiglmeier K, Gas S, Barry  
692 CE, 3rd, Tekaia F, Badcock K, Basham D, Brown D, Chillingworth T, Connor R, Davies R, Devlin K,  
693 Feltwell T, Gentles S, Hamlin N, Holroyd S, Hornsby T, Jagels K, Krogh A, McLean J, Moule S,  
694 Murphy L, Oliver K, Osborne J, Quail MA, Rajandream MA, Rogers J, Rutter S, Seeger K, Skelton J,  
695 Squares R, Squares S, Sulston JE, Taylor K, Whitehead S, Barrell BG. 1998. Deciphering the biology of  
696 *Mycobacterium tuberculosis* from the complete genome sequence. *Nature* 393:537-44.
- 697 63. Jagielski T, Grzeszczuk M, Kaminski M, Roeske K, Napiorkowska A, Stachowiak R, Augustynowicz-  
698 Kopec E, Zwolska Z, Bielecki J. 2013. Identification and analysis of mutations in the *katG* gene in  
699 multidrug-resistant *Mycobacterium tuberculosis* clinical isolates. *Pneumonol Alergol Pol* 81:298-307.

- 700 64. Brossier F, Veziris N, Truffot-Pernot C, Jarlier V, Sougakoff W. 2006. Performance of the genotype  
701 MTBDR line probe assay for detection of resistance to rifampin and isoniazid in strains of  
702 Mycobacterium tuberculosis with low- and high-level resistance. *J Clin Microbiol* 44:3659-64.
- 703 65. Manson AL, Abeel T, Galagan JE, Sundaramurthi JC, Salazar A, Gehrman T, Shanmugam SK,  
704 Palaniyandi K, Narayanan S, Swaminathan S, Earl AM. 2017. Mycobacterium tuberculosis Whole  
705 Genome Sequences From Southern India Suggest Novel Resistance Mechanisms and the Need for  
706 Region-Specific Diagnostics. *Clin Infect Dis* 64:1494-1501.
- 707 66. WHO. 2016. WHO treatment guidelines for drug-resistant tuberculosis.  
708 <http://apps.who.int/iris/bitstream/10665/250125/1/9789241549639-eng.pdf?ua=1>. Accessed October  
709 18th, 2017.
- 710 67. Pelly S, Winglee K, Xia F, Stevens RL, Bishai WR, Lamichhane G. 2016. REMap: Operon map of M.  
711 tuberculosis based on RNA sequence data. *Tuberculosis (Edinb)* 99:70-80.
- 712 68. Crudu V, Stratan E, Romancenco E, Allerheiligen V, Hillemann A, Moraru N. 2012. First evaluation of  
713 an improved assay for molecular genetic detection of tuberculosis as well as rifampin and isoniazid  
714 resistances. *J Clin Microbiol* 50:1264-9.
- 715 69. Daum LT, Fischer GW, Sromek J, Khubbar M, Hunter P, Gradus MS, Bhattacharyya S. 2014.  
716 Characterization of multi-drug resistant Mycobacterium tuberculosis from immigrants residing in the  
717 USA using Ion Torrent full-gene sequencing. *Epidemiol Infect* 142:1328-33.
- 718 70. Leung ET, Ho PL, Yuen KY, Woo WL, Lam TH, Kao RY, Seto WH, Yam WC. 2006. Molecular  
719 characterization of isoniazid resistance in Mycobacterium tuberculosis: identification of a novel  
720 mutation in inhA. *Antimicrob Agents Chemother* 50:1075-8.
- 721 71. Hazbon MH, Motiwala AS, Cavatore M, Brimacombe M, Whittam TS, Alland D. 2008. Convergent  
722 evolutionary analysis identifies significant mutations in drug resistance targets of Mycobacterium  
723 tuberculosis. *Antimicrob Agents Chemother* 52:3369-76.

- 724 72. Machado D, Perdigo J, Ramos J, Couto I, Portugal I, Ritter C, Boettger EC, Viveiros M. 2013. High-  
725 level resistance to isoniazid and ethionamide in multidrug-resistant *Mycobacterium tuberculosis* of the  
726 Lisboa family is associated with *inhA* double mutations. *J Antimicrob Chemother* 68:1728-32.
- 727 73. Manjunatha UH, SP SR, Kondreddi RR, Noble CG, Camacho LR, Tan BH, Ng SH, Ng PS, Ma NL,  
728 Lakshminarayana SB, Herve M, Barnes SW, Yu W, Kuhlen K, Blasco F, Beer D, Walker JR, Tonge PJ,  
729 Glynne R, Smith PW, Diagana TT. 2015. Direct inhibitors of *InhA* are active against *Mycobacterium*  
730 *tuberculosis*. *Sci Transl Med* 7:269ra3.
- 731 74. Musser JM. 1995. Antimicrobial agent resistance in mycobacteria: molecular genetic insights. *Clin*  
732 *Microbiol Rev* 8:496-514.
- 733 75. Zhang H, Li D, Zhao L, Fleming J, Lin N, Wang T, Liu Z, Li C, Galwey N, Deng J, Zhou Y, Zhu Y,  
734 Gao Y, Wang T, Wang S, Huang Y, Wang M, Zhong Q, Zhou L, Chen T, Zhou J, Yang R, Zhu G, Hang  
735 H, Zhang J, Li F, Wan K, Wang J, Zhang XE, Bi L. 2013. Genome sequencing of 161 *Mycobacterium*  
736 *tuberculosis* isolates from China identifies genes and intergenic regions associated with drug resistance.  
737 *Nat Genet* 45:1255-60.
- 738 76. Cardoso RF, Cooksey RC, Morlock GP, Barco P, Cecon L, Forestiero F, Leite CQ, Sato DN, Shikama  
739 Mde L, Mamizuka EM, Hirata RD, Hirata MH. 2004. Screening and characterization of mutations in  
740 isoniazid-resistant *Mycobacterium tuberculosis* isolates obtained in Brazil. *Antimicrob Agents*  
741 *Chemother* 48:3373-81.
- 742 77. Chan RC, Hui M, Chan EW, Au TK, Chin ML, Yip CK, AuYeang CK, Yeung CY, Kam KM, Yip PC,  
743 Cheng AF. 2007. Genetic and phenotypic characterization of drug-resistant *Mycobacterium tuberculosis*  
744 isolates in Hong Kong. *J Antimicrob Chemother* 59:866-73.

745

746

747



748

749

750

751

752 **Figure Legends**

753 **Figure 1: Selection and exclusion criteria for clinical strains included in this study.**

754

755

756

757

758

759

760

761

762

763

764

765

766

767

768

769

770

771

772

773

774

775

776

777 **Figure 2: Genetic impact of large insertions and deletions at the *furA-katG-Rv1907c* operon in clinical**

778 **MTBC strains.** Of the 14/52 study set clinical strains that encoded large (>10 bp) insertions or deletions at the

779 *furA-katG-Rv1907c* operon, 7/14 were predicted to impact *katG* activity leading to INH resistance. The

780 insertions/deletions present at this locus in the other 7/14 strains were not predicted to impact INH resistance

781 based on the literature, but were generally accompanied by mutations in *katG* (6/7 strains) likely to confer the

782 INH-R phenotype. These seven strains also shared an identical 14 bp deletion in *Rv1907c* (marked with an

783 asterisk; deleted sequence: TCATCCCCGTCTCG) and were of the same lineage (L2). One strain presented

784 here, RLT-5, did not encode any mutations clearly related to INH resistance. Dotted line boxes indicate deleted

785 sequence. Carrots indicate insertion sites. Hatched open reading frames are co-transcribed in *Mtb* (67).

786 Promoters are indicated by bent arrows (45).

787

788

789

790

791

792

793

794

795

796

797

798

799

800

801

802

803

804

805

806

807

808

809

810

811

812

813

814

815

816

817

818

819

**Figure 3: INH resistance determinants in *Mtb*.** Illustration (not to scale) of the two primary loci involved in INH resistance, *furA-katG* and *fabG1-inhA*. Promoters are shown as bent arrows (a novel promoter generated by the *fabG1* L203L silent mutation is depicted with dashed outline). Shown in parentheses are mutations previously confirmed by functional genetics in *Mtb* (16-18, 21-23). Underlined mutations are targeted by conventional rapid molecular tests [Hain GenoType MTBDRplus v2 (29, 68), Nipro NTM+MDRTB Detection Kit 2 (30), CDC's Molecular Detection of Drug Resistance (MDDR) service]. Windows of detection for CDC's MDDR service Sanger sequencing assay, per current primer binding sites, are shown as grey bubbles (Jeff Driscoll, personal communication). Recombineered INH resistance mutations from this study are in larger text and bolded. Mutations in unformatted text were observed among INH-R clinical MTBC strains analyzed by WGS in this study and were generally considered likely to confer INH resistance due to previous reports in the literature (see **Table 1**). *ahpC* promoter mutations have not yet been definitively demonstrated to independently confer INH resistance in MTBC and thus are not depicted here. This illustration omits numerous mutations observed in clinical isolates of MTBC or evaluated in other organisms/biochemically, and is not intended to be comprehensive.

820

821

822

823

824

## Tables and Figures

**Table 1:** Uncommon mutations most likely<sup>1</sup> to confer INH resistance in each clinical strain of the study set lacking canonical INH associated mutations, as identified by WGS

| Strain   | <i>M. tuberculosis</i> SNP-based sublineage | INH resistance associated locus <sup>2</sup>               |             |                                                   |              |             | INH MIC (µg/mL) |
|----------|---------------------------------------------|------------------------------------------------------------|-------------|---------------------------------------------------|--------------|-------------|-----------------|
|          |                                             | <i>furA-katG</i> and proximal <i>katG</i> promoter regions | <i>katG</i> | <i>ahpC</i> promoter region <sup>3</sup>          | <i>fabG1</i> | <i>inhA</i> |                 |
| PETTS-1  | 1.2.2                                       |                                                            |             | g-142a                                            | L203L        |             | 0.50            |
| PETTS-2  | 4.3.4.2                                     |                                                            | 3' deletion | -47ins_t                                          |              |             | >4.00           |
| PETTS-3  | 1.2.1                                       |                                                            |             | g-142a                                            | L203L        | I21T*       | 4.00            |
| PETTS-4  | 4.3.4.1                                     |                                                            | V423fs      | c-81t                                             |              |             | >4.00           |
| PETTS-5  | 1.2.1                                       |                                                            | S315N       | g-142a                                            |              |             | 1.00            |
| PETTS-6  | 1.2.1                                       |                                                            | W300R       | g-142a, g-74a                                     |              |             | 0.50            |
| PETTS-7  | 1.2.1                                       |                                                            | N138S       | g-142a, g-48a                                     |              |             | >4.00           |
| PETTS-8  | 1.2.1                                       |                                                            | V1A         | g-142a, g-51a                                     |              |             | 1.00            |
| PETTS-9  | 2.2.1                                       |                                                            | S315G       |                                                   |              |             | 0.50            |
| PETTS-10 | 1.2.1                                       |                                                            | L415P       | g-142a, c-54t                                     |              |             | >4.00           |
| PETTS-11 | 1.2.2                                       |                                                            |             | g-142a                                            | L203L        |             | 0.50            |
| PETTS-12 | 4.1.1.3                                     |                                                            | E402stop    | c-57t                                             |              |             | >4.00           |
| PETTS-13 | 2.2.1                                       |                                                            | V1A         | c-52t                                             |              |             | >4.00           |
| PETTS-14 | 2.2.1.1                                     |                                                            | G285R*      |                                                   |              |             | 0.25            |
| PETTS-15 | 1.2.2                                       |                                                            |             | g-142a                                            | L203L        | I194T*      | 2.00            |
| PETTS-16 | 1.2.2                                       |                                                            |             | g-142a                                            | L203L        | I194T*      | 2.00            |
| PETTS-17 | 1.2.2                                       |                                                            |             |                                                   | L203L        | I194T*      | 4.00            |
| PETTS-18 | 1.2.2                                       |                                                            |             | g-142a                                            | L203L        | I194T*      | 2.00            |
| PETTS-19 | 1.2.2                                       |                                                            |             |                                                   | L203L        | I194T*      | 2.00            |
| PETTS-20 | 3.1.1                                       |                                                            | S331fs      | g-88a                                             |              |             | >4.00           |
| PETTS-21 | 2.2.1                                       |                                                            |             |                                                   | L203L        |             | 0.25            |
| PETTS-22 | 4.3.4.2.1                                   | no known INH resistance mutations                          |             |                                                   |              |             | >4.00           |
| PETTS-23 | 2.2.1                                       |                                                            | A480del     | -47ins_t                                          |              |             | >4.00           |
| PETTS-24 | 2.2.1                                       |                                                            | G123fs      | <i>ahpC-ahpD</i> overrepresented in sequence data |              |             | >4.00           |
| PETTS-25 | 2.2.2                                       |                                                            | T322M*      |                                                   |              |             | >4.00           |

|                     |                     |                                                                         |                                                                 |           |  |       |       |
|---------------------|---------------------|-------------------------------------------------------------------------|-----------------------------------------------------------------|-----------|--|-------|-------|
| PETTS-26            | 2.2.2               | <i>furA-katG</i><br>promoter<br>deleted                                 |                                                                 |           |  |       | 4.00  |
| PETTS-27            | 2.2.1               | <i>furA-katG</i><br>promoter<br>deleted                                 |                                                                 |           |  |       | 1.00  |
| PETTS-28            | 2.2.1               |                                                                         | W328R                                                           | -47ins_t  |  |       | >4.00 |
| PETTS-29            | 2.2.1               |                                                                         | W161R                                                           |           |  |       | 0.50  |
| Myco-1              | 4.3.2               |                                                                         | W328R,<br>A379V*                                                | g-48a     |  |       | >4.00 |
| Myco-2              | 4.8                 |                                                                         | G234E*                                                          |           |  |       | 2.00  |
| Myco-3              | 4.1.2.1             |                                                                         | P232A*                                                          |           |  |       | 1.00  |
| Myco-4              | 4.1                 |                                                                         | W107stop                                                        | g-48a     |  |       | >4.00 |
| Myco-5              | 4.8                 |                                                                         | V1A, F408L*                                                     | -84ins_tc |  |       | >4.00 |
| Myco-6              | 4.2.1               | no known INH resistance mutations                                       |                                                                 |           |  |       | >4.00 |
| Myco-7              | 2.2.1               |                                                                         | G490D*                                                          | c-52t     |  |       | >4.00 |
| Myco-8              | 2.2.2               |                                                                         | G169S*                                                          | c-52t     |  |       | 0.25  |
| Myco-9              | 4.1.1.3             | <i>furA-katG</i><br>promoter<br>deleted                                 |                                                                 |           |  |       | >4.00 |
| Myco-10             | 2.2.1               |                                                                         | G630fs                                                          | g-48a     |  |       | >4.00 |
| Myco-11             | 4.3.2               |                                                                         | V1A                                                             |           |  |       | 2.00  |
| Myco-12             | 2.2.1               |                                                                         | W161Q,<br>D573G*                                                | c-52t     |  |       | >4.00 |
| RLT-1               | 2.2.1               | <i>furA-katG</i><br>and <i>katG</i><br>proximal<br>promoters<br>deleted | complete<br>deletion                                            | g-74a     |  |       | >4.00 |
| RLT-2 <sup>††</sup> | 4.8                 |                                                                         | Heterozygous<br>WT, L48fs<br>and G177fs;<br>mixed<br>infection? |           |  |       | >4.00 |
| RLT-3               | 2.2.1               | <i>furA-katG</i><br>and <i>katG</i><br>proximal<br>promoters<br>deleted | complete<br>deletion                                            | g-373c    |  |       | >4.00 |
| RLT-4               | 2.2.1.2             |                                                                         | A411D <sup>†</sup>                                              |           |  |       | >4.00 |
| RLT-5               | 2.2.1               | no known INH resistance mutations                                       |                                                                 |           |  |       | 2.00  |
| RLT-6               | ( <i>M. bovis</i> ) |                                                                         |                                                                 |           |  | I21T* | >4.00 |
| RLT-7               | 2.2.1               |                                                                         | D142N*                                                          |           |  |       | >4.00 |
| RLT-8               | 4.3.3               |                                                                         | G490C*                                                          |           |  |       | 0.25  |
| RLT-9               | 4.8                 |                                                                         | W91G*                                                           |           |  |       | 0.50  |
| RLT-10              | 4.8                 |                                                                         | W39stop                                                         |           |  |       | >4.00 |
| RLT-11              | 4.3.2               | <i>furA-katG</i><br>and <i>katG</i><br>proximal<br>promoters<br>deleted | 2,045 bp<br>deletion                                            | g-48a     |  |       | >4.00 |

<sup>1</sup>Mutations shown as resistance determinants were considered the mostly likely to directly cause INH resistance out of all mutations observed for each strain based on the literature (see text)

<sup>2</sup>Grey fill indicates that the locus had sequence identical to the H37Rv reference or that mutations found were not associated with INH resistance in the literature (e.g. *katG* R463L; see text)

<sup>3</sup>*ahpC* promoter mutations have been included in this table because they are associated with uncommon INH resistance conferring mutations elsewhere, but we note that it is not clear whether *ahpC* promoter mutations leading to increased *ahpC* transcription can independently confer INH resistance.

\*Missense mutations in our study set which were not assessed by recombineering but are likely to contribute to INH resistance based on previous reports of changes to those codons in the literature (12, 14, 41, 43, 63, 69-77)

<sup>†</sup>The A411D mutation was not assessed by recombineering and could not be found in the literature

<sup>††</sup>The RLT-2 strain had two frameshift mutations in *katG* (L48fs and G177fs) that were present in 34% and 37% of the reads at each position, respectively

825

826

**TABLE 2:** Rare *katG* mutations that confer INH resistance as determined by recombineering

| Strain                                  | INH MIC <sup>3</sup><br>(µg/mL) | Clinical interpretation | INH MIC(s) in clinical strains with mutation <sup>4</sup><br>(µg/mL)                                    |
|-----------------------------------------|---------------------------------|-------------------------|---------------------------------------------------------------------------------------------------------|
| H37Rv                                   | 0.06                            | Susceptible             | N/A                                                                                                     |
| H37Rv <i>katG</i> V1A                   | >4.00                           | High-level resistance   | 1.00 <sup>PETTS-8</sup> , >4.00 <sup>PETTS-13</sup> , >4.00 <sup>MYCO-5</sup> , 2.00 <sup>MYCO-11</sup> |
| H37Rv <i>katG</i> A110V                 | 0.25                            | Low-level resistance    | N/A <sup>†</sup>                                                                                        |
| H37Rv <i>katG</i> N138S                 | >4.00                           | High-level resistance   | >4.00 <sup>PETTS-7</sup>                                                                                |
| H37Rv <i>katG</i> W161Q <sup>1</sup>    | 0.25                            | Low-level resistance    | >4.00 <sup>MYCO-12</sup>                                                                                |
| H37Rv <i>katG</i> W161R <sup>1</sup>    | 4.00                            | High-level resistance   | 0.50 <sup>PETTS-29</sup>                                                                                |
| H37Rv <i>katG</i> W300R                 | 1.00                            | Low-level resistance    | 0.50 <sup>PETTS-6</sup>                                                                                 |
| H37Rv <i>katG</i> S315G                 | 0.25                            | Low-level resistance    | 0.50 <sup>PETTS-9</sup>                                                                                 |
| H37Rv <i>katG</i> S315N                 | >4.00                           | High-level resistance   | 1.00 <sup>PETTS-5</sup>                                                                                 |
| H37Rv <i>katG</i> S315T <sup>2</sup>    | >4.00                           | High-level resistance   | N/A                                                                                                     |
| H37Rv <i>katG</i> W328R                 | >4.00                           | High-level resistance   | >4.00 <sup>PETTS-28</sup> , >4.00 <sup>MYCO-1</sup>                                                     |
| H37Rv <i>katG</i> E402stop <sup>1</sup> | >4.00                           | High-level resistance   | >4.00 <sup>PETTS-12</sup>                                                                               |
| H37Rv <i>katG</i> L415P <sup>1</sup>    | >4.00                           | High-level resistance   | >4.00 <sup>PETTS-10</sup>                                                                               |
| H37Rv <i>katG</i> A480del <sup>1</sup>  | >4.00                           | High-level resistance   | >4.00 <sup>PETTS-23</sup>                                                                               |

<sup>1</sup>Novel mutations found in this study

<sup>2</sup>Control mutation that is widely known to confer high-level INH resistance; we were not able to recombineer the other control mutation, *katG* W107stop (see text)

<sup>3</sup>MICs of the recombineered *katG* mutants of H37Rv

<sup>4</sup>MICs of the clinical strains encoding mutations chosen for functional genetics analysis are in grey. Corresponding clinical strain names from **Table 1** are in superscript; note that many of the clinical strains had multiple INH resistance associated mutations or other mutations (e.g. *katG* R463L) and thus MICs may not match those of recombineered strains harboring only a single *katG* mutation

<sup>†</sup>The *katG* A110V mutation did not occur in our study set of clinical strains, but was previously associated with INH MICs of <1 µg/mL in 6/7 tested clinical isolates (64)

827

828

829

830

831

832

833

834

835

836

## Figure 1

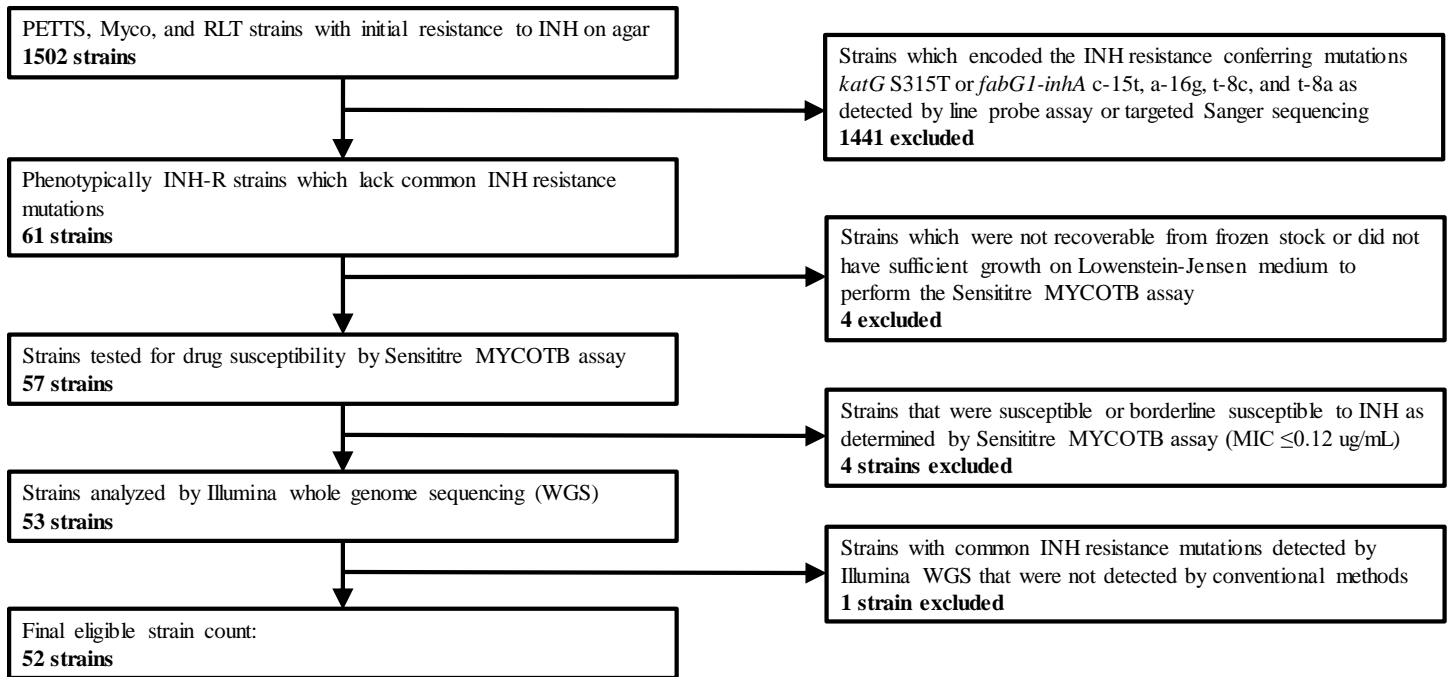

837

838

**Figure 1: Selection and exclusion criteria for clinical strains included in this study.**

839

840

841

842

843

844

845

846

847

848

849

850

851

852



853

**Figure 2**

| Strain name              | Deletion/insertion site and size                    | Illustration of <i>furA-katG-Rv1907c</i> indels | Predicted <i>katG</i> genetic impact                                                                                     | INH MIC (µg/mL) | Other mutations in                                                               |
|--------------------------|-----------------------------------------------------|-------------------------------------------------|--------------------------------------------------------------------------------------------------------------------------|-----------------|----------------------------------------------------------------------------------|
|                          |                                                     |                                                 |                                                                                                                          |                 | INH-associated regions                                                           |
| H37Rv (reference strain) | n/a                                                 |                                                 | Wild-type expression                                                                                                     | 0.06            | N/A                                                                              |
| PETTS-2                  | 2148655 - 2153938 (5283 bp)                         |                                                 | Truncation of last 4 C-terminal KatG amino acids; changes to final 12 amino acids                                        | >4.00           | N/A                                                                              |
| PETTS-25*                | 2153726 - 2153739 (14 bp)                           |                                                 | Unknown                                                                                                                  | >4.00           | <i>katG</i> T322M                                                                |
| PETTS-26                 | 2156366 - 2159298 (2932 bp)                         |                                                 | Loss of <i>furA-katG</i> promoter leading to decreased <i>katG</i> transcription                                         | 4.00            | N/A                                                                              |
| PETTS-27                 | 2156508 - 2164531 (8023 bp)                         |                                                 | Loss of <i>furA-katG</i> promoter leading to decreased <i>katG</i> transcription                                         | 1.00            | N/A                                                                              |
| Myc-5                    | 2156525 - 2156539 (14 bp) / Ins. at 2153874 (10 bp) |                                                 | Deletion: frameshift in <i>furA</i> potentially leading to derepression of <i>katG</i> transcription; Insertion: unknown | >4.00           | <i>katG</i> V1A, <i>katG</i> F408L                                               |
| Myc-9                    | 2156312 - 2161413 (5101 bp)                         |                                                 | Loss of <i>furA-katG</i> promoter leading to decreased <i>katG</i> transcription                                         | >4.00           | N/A                                                                              |
| Myc-10*                  | 2153726 - 2153739 (14 bp)                           |                                                 | Unknown                                                                                                                  | >4.00           | <i>katG</i> G630fs                                                               |
| Myc-12*                  | 2153726 - 2153739 (14 bp)                           |                                                 | Unknown                                                                                                                  | >4.00           | <i>katG</i> W161Q, <i>katG</i> D573G, <i>katG</i> N701D                          |
| RLT-1                    | 2105387-2158350 (52,963 bp)                         |                                                 | Total loss of <i>katG</i> and both promoters                                                                             | >4.00           | N/A                                                                              |
| RLT-3                    | 2136961-2165903 (28,942 bp)                         |                                                 | Total loss of <i>katG</i> and both promoters                                                                             | >4.00           | N/A                                                                              |
| RLT-4*                   | 2153726-2153739 (14 bp)                             |                                                 | Unknown                                                                                                                  | >4.00           | <i>katG</i> A411D                                                                |
| RLT-5*                   | 2153726-2153739 (14 bp)                             |                                                 | Unknown                                                                                                                  | 2.00            | <i>mmpL7</i> c-215t, <i>mmpL7</i> a-430g, <i>pks8</i> L1228V, <i>pks8</i> A1357T |
| RLT-7*                   | 2153726-2153739 (14 bp)                             |                                                 | Unknown                                                                                                                  | >4.00           | <i>katG</i> D142N                                                                |
| RLT-11                   | 2154065-2159587 (5,522 bp)                          |                                                 | Loss of both the <i>furA-katG</i> and <i>katG</i> promoters, in addition to 2,045 bp of the <i>katG</i> ORF              | >4.00           | N/A                                                                              |

854

855 **Figure 2: Genetic impact of large insertions and deletions at the *furA-katG-Rv1907c* operon in clinical**  
 856 **MTBC strains.** Of the 14/52 study set clinical strains that encoded large (>10 bp) insertions or deletions at the  
 857 *furA-katG-Rv1907c* operon, 7/14 were predicted to impact *katG* activity leading to INH resistance. The  
 858 insertions/deletions present at this locus in the other 7/14 strains were not predicted to impact INH resistance  
 859 based on the literature, but were generally accompanied by mutations in *katG* (6/7 strains) likely to confer the  
 860 INH-R phenotype. These seven strains also shared an identical 14 bp deletion in *Rv1907c* (marked with an  
 861 asterisk; deleted sequence: TCATCCCCGTCTCG) and were of the same lineage (L2). One strain presented  
 862 here, RLT-5, did not encode any mutations clearly related to INH resistance. Dotted line boxes indicate deleted  
 863 sequence. Carrots indicate insertion sites. Hatched open reading frames are co-transcribed in *Mtb* (67).  
 864 Promoters are indicated by bent arrows (45).

865

### Figure 3

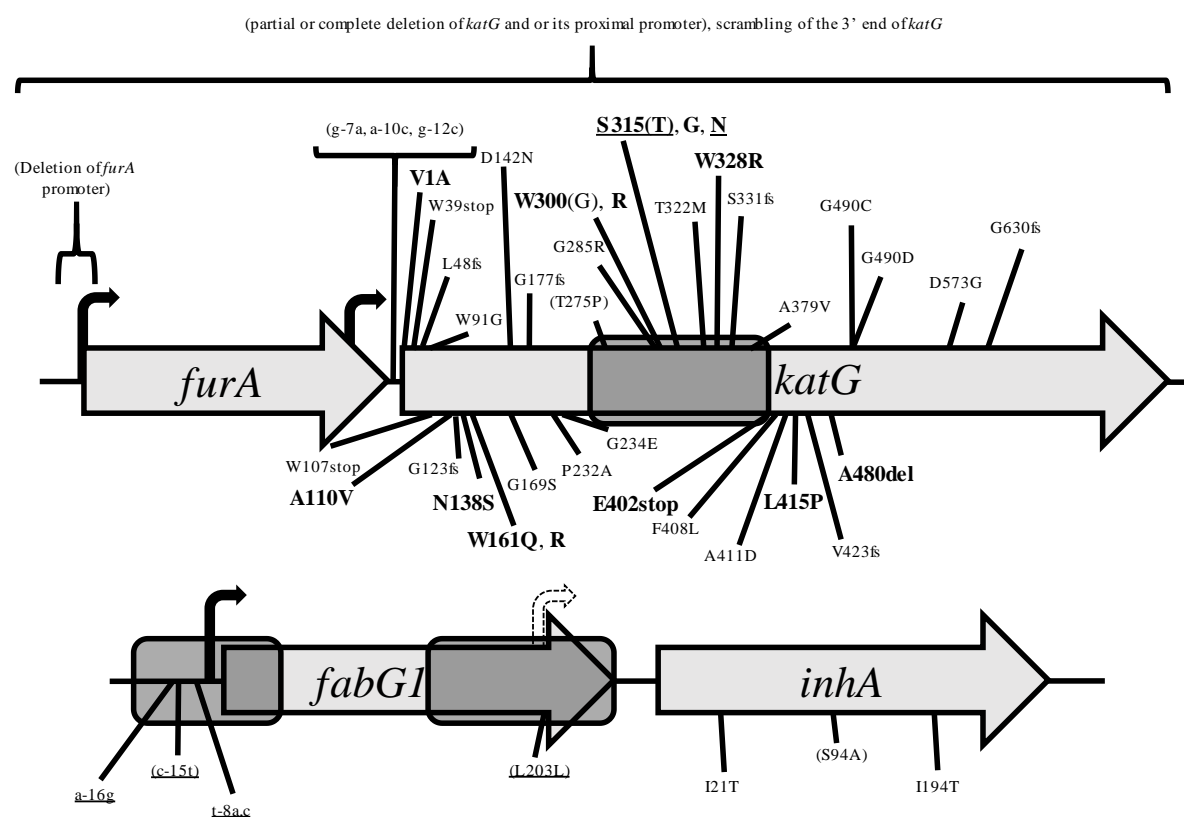

866

867

868

869

870

871

872

873

874

875

876

877

878

**Figure 3: INH resistance determinants in *Mtb*.** Illustration (not to scale) of the two primary loci involved in INH resistance, *furA-katG* and *fabG1-inhA*. Promoters are shown as bent arrows (a novel promoter generated by the *fabG1* L203L silent mutation is depicted with dashed outline). Shown in parentheses are mutations previously confirmed by functional genetics in *Mtb* (16-18, 21-23). Underlined mutations are targeted by conventional rapid molecular tests [Hain GenoType MTBDRplus v2 (29, 68), Nipro NTM+MDRTB Detection Kit 2 (30), CDC's Molecular Detection of Drug Resistance (MDDR) service]. Windows of detection for CDC's MDDR service Sanger sequencing assay, per current primer binding sites, are shown as grey bubbles (Jeff Driscoll, personal communication). Recombineered INH resistance mutations from this study are in larger text and bolded. Mutations in unformatted text were observed among INH-R clinical MTBC strains analyzed by WGS in this study and were generally considered likely to confer INH resistance due to previous reports in the literature (see **Table 1**). *ahpC* promoter mutations have not yet been definitively demonstrated to independently confer INH resistance in MTBC and thus are not depicted here. This illustration omits numerous mutations

879 observed in clinical isolates of MTBC or evaluated in other organisms/biochemically, and is not intended to be  
880 comprehensive.
